1 Christmas disease in a Hovawart family resembling human  
2 hemophilia B Leyden is caused by a single nucleotide deletion in a  
3 highly conserved transcription factor binding site of the *F9* gene  
4 promoter

5

6 Bertram Brenig<sup>1¶\*</sup>, Lilith Steingräber<sup>1¶</sup>, Shuwen Shan<sup>1</sup>, Fangzheng Xu<sup>1</sup>, Marc Hirschfeld<sup>1,2</sup>,  
7 Reiner Andag<sup>3</sup>, Mirjam Spengeler<sup>4</sup>, Elisabeth Dietschi<sup>4</sup>, Reinhard Mischke<sup>5</sup>, Tosso Leeb<sup>4</sup>

8

9

10

11 1 University of Goettingen, Institute of Veterinary Medicine, Burckhardtweg 2, 37077  
12 Goettingen, Germany

13 2 Department of Obstetrics and Gynecology, Freiburg University Medical Center, 79106  
14 Freiburg, Germany

15 3 University Medical Center Goettingen, Institute for Clinical Chemistry, 37075 Goettingen,  
16 Germany

17 4 Institute of Genetics, University of Bern, 3001 Bern, Switzerland

18 5 Small Animal Clinic, University of Veterinary Medicine Hannover Foundation, 30559  
19 Hannover, Germany

20

21 ¶ These authors contributed equally to this work.

22

23 BB [bbrenig@gwdg.de](mailto:bbrenig@gwdg.de)  
24 LS [lilith.steingraeber@agr.uni-goettingen.de](mailto:lilith.steingraeber@agr.uni-goettingen.de)  
25 SS [shuwen.shan@stud.uni-goettingen.de](mailto:shuwen.shan@stud.uni-goettingen.de)  
26 FX [fangzheng.xu@stud.uni-goettingen.de](mailto:fangzheng.xu@stud.uni-goettingen.de)  
27 MH [marc.hirschfeld@uni-goettingen.de](mailto:marc.hirschfeld@uni-goettingen.de)  
28 RA [reiner.andag@med.uni-goettingen.de](mailto:reiner.andag@med.uni-goettingen.de)  
29 MS [mirjam.spengeler@qualitasag.ch](mailto:mirjam.spengeler@qualitasag.ch)  
30 ED [elisabeth.dietschi@vetsuisse.unibe.ch](mailto:elisabeth.dietschi@vetsuisse.unibe.ch)  
31 RM [Reinhard.Mischke@tiho-hannover.de](mailto:Reinhard.Mischke@tiho-hannover.de)  
32 TL [tosso.leeb@vetsuisse.unibe.ch](mailto:tosso.leeb@vetsuisse.unibe.ch)

33

34 \*Please address correspondence to:

35 Prof. Dr. Bertram Brenig

36 Institute of Veterinary Medicine

37 Burckhardtweg 2

38 D-37077 Göttingen

39 Phone +49-551-3933383

40 Fax +49-551-3933392

41 Email [bbrenig@gwdg.de](mailto:bbrenig@gwdg.de)

## 42 Abstract

43 Hemophilia B is a classical monogenic X-chromosomal recessively transmitted bleeding  
44 disorder caused by genetic variants within the coagulation factor IX gene (*F9*). Although  
45 hemophilia B has been described in 28 dog breeds and four mixed-breed dogs hitherto, it  
46 has not yet been reported in the Hovawart. Here we describe the identification of a  
47 Hovawart family transmitting typical signs of an X-linked bleeding disorder. Five males had  
48 been reported to suffer from recurrent hemorrhagic episodes, four of them had to be  
49 euthanized finally and one died due to severe blood loss. A blood sample of one of these  
50 males with only 2% of the normal concentration of plasma factor IX (FIX) together with  
51 samples of seven relatives including the mother and grandmother were provided for further  
52 analysis. Next generation sequencing of DNA of the mother and grandmother revealed a  
53 single nucleotide deletion in the *F9* promoter (NC\_006621.3:g.109,501,492delC;  
54 CanFam3.1). Genotyping of the deletion in 1,298 dog specimens (81 different breeds)  
55 including 720 Hovawarts revealed that the mutant allele was only present in the  
56 aforementioned Hovawart family. The deletion is located 73 bp upstream of the *F9* start  
57 codon in the highly conserved overlapping DNA binding sites of hepatocyte nuclear factor 4 $\alpha$   
58 (HNF4 $\alpha$ ) and androgen receptor (AR). The deletion only abolishes binding of HNF4 $\alpha$  as  
59 demonstrated by electrophoretic mobility shift assay (EMSA) using purified recombinant  
60 human HNF4 $\alpha$  and a transient overexpression lysate of human AR with double-stranded  
61 DNA probes encompassing the mutant promoter region. Luciferase reporter assays using  
62 wild type and mutated promoter fragment constructs transfected into Hep G2 cells showed  
63 a 65.3% reduction in expression from the mutant promoter. The data presented here  
64 provide evidence that the deletion identified in the Hovawart family caused a rare type of  
65 hemophilia B resembling human hemophilia B Leyden.

66

## 67 Author summary

68 Hemophilia B is the rarer form of classical hemophilias resulting from the absence or residual  
69 activity of blood clotting factor IX. Due to its X-linked recessive inheritance normally only  
70 males are affected. In a disease subtype, termed hemophilia B Leyden, factor IX activities  
71 increase during puberty resulting in spontaneous improvement of bleeding symptoms or  
72 even clinical recovery. This surprising development-related alteration is caused by  
73 nucleotide variants in important developmental and hormone-responsive regulatory regions  
74 of the factor IX gene promoter interfering with transcription factor binding. Although  
75 hemophilia B has been reported in several dog breeds, subtypes resembling human  
76 hemophilia B Leyden were unknown hitherto. In addition, the single nucleotide deletion  
77 reported here in Hovawarts in the overlapping binding sites of transcription factor HNF4 $\alpha$   
78 and androgen receptor only affecting HNF4 $\alpha$  binding, was unexpected. Although it is  
79 advisable to genotype females in the future to prevent a further spread of this subtype of  
80 the disorder, our findings also open up the possibility not to euthanize affected males  
81 inevitably but to treat until puberty if necessary.

## 82 Introduction

83 Hemophilia B (Christmas disease) is a recessive X-linked bleeding disorder caused by genetic  
84 variants within the clotting factor IX gene (*F9*) resulting in the absence or insufficient levels  
85 of factor IX (FIX) in the blood [1]. In humans hemophilia B is also known as the “royal  
86 disease” as it has been transmitted into several European royal dynasties by Queen Victoria  
87 [2, 3]. Currently, 1,113 unique *F9* variants have been described in man [4]. The majority of  
88 pathogenic variants is located within exons (923) and intronic regions (137) of *F9*. Only 33  
89 variants (2.96%) have been described in the 5′-UTR (28) and 3′-UTR (5) accounting for 2.52%  
90 and 0.45% of human pathogenic hemophilia B variants, respectively [4].

91 Although first reports about canine hemophilia B date back to the early 1960’s and also  
92 being the first disorder in dogs characterized on DNA level, data on hemophilia B cases in  
93 dogs remain rather scarce compared to humans [5-8]. For instance, in the Cairn Terrier  
94 colony of the Francis Owen Blood Research Laboratory (University of North Carolina at  
95 Chapel Hill) a G>A transition (NC\_006621.3:g.109,532,018G>A) in exon 8 causing an amino  
96 acid exchange (NP\_001003323.1:p.Gly418Glu) was detected resulting in a complete lack of  
97 circulating FIX in affected dogs [9]. Due to a complete deletion of *F9* in Labrador Retriever,  
98 production of FIX inhibitors was detected after transfusion of canine blood products [10]. In  
99 two unrelated Airedale Terrier breeds a large deletion of the entire 5′ region of *F9* extending  
100 to exon 6 and a 5 kb insertion disrupting exon 8 was described, respectively [11]. Similar to  
101 the hemophilia B in the Labrador Retriever in both breeds FIX inhibitors were produced. A  
102 mild hemophilia B in German Wirehaired Pointers was caused by a 1.5 kb Line-1 insertion in  
103 intron 5 of *F9* at position NC\_006621.3:g.109,521,130 [12]. Until today, hemophilia B has  
104 been described in four mixed-breed dogs and 28 dog breeds, e.g. German Shepherd, Lhasa  
105 Apso, Labrador Retriever, Rhodesian Ridgeback, Airedale Terrier, Cairn Terrier, Maltese and  
106 German Wirehaired Pointer [9-17].

107 In the canine cases analysed so far on DNA level, mutations have been observed only in  
108 exons and introns of *F9*, whereas alterations of the *F9* promoter have not yet been reported.  
109 In humans promoter variants have been detected resulting in the so-called hemophilia B  
110 Leyden characterized by low levels of FIX until puberty, whereas after puberty FIX  
111 concentrations rise to almost normal levels [18-20]. Since the first description, the genetic  
112 background of human hemophilia B Leyden was elucidated by various studies identifying  
113 variants in different transcription factor binding sites in the *F9* promoter including androgen-  
114 responsive element (ARE), hepatocyte nuclear factor 4α (HNF4α), one cut homeobox  
115 (ONECUT1/2) and CCAAT/enhancing-binding protein α (C/EBPα) binding sites [21, 22]. A  
116 special variant is hemophilia B Brandenburg resulting from variants in the overlapping  
117 binding site of HNF4α and AR [23, 24]. Unlike the classical hemophilia B Leyden, in patients  
118 with these variants FIX levels cannot be restored by testosterone-driven AR activity and  
119 remain low after puberty with no clinical recovery [21, 24].

120

## 121 Results and Discussion

122 Hemophilias are rare diseases in dogs and hence it was rather coincidental that a case in a  
123 Hovawart (3, Fig 1) was reported to us. With the reconstruction of the pedigree it was

124 possible to trace back the disease to the female conductor 39 (Fig 1). In the studied family  
125 the hemophilia was transmitted to 19, 4 and 6. 19 had one litter with 3 hemophilic males  
126 (48, 51, 53). 4 and 6 had litters with 1 affected male 60 and 3, respectively. Although DNA  
127 samples of 48, 51, 53 and 60 were not available, blood parameters and medical reports  
128 about recurrent hemorrhagic episodes were provided (Table 1). These males had increased  
129 activated partial thromboplastin times (aPTT) of 47.8 sec (53) to 72.9 sec (60) indicative for  
130 defects of the intrinsic coagulation pathway and also reduced FIX concentrations in the  
131 blood as is normally the case in hemophilia B. The affected dog 3 presented only 2% of the  
132 standard FIX concentration. The female conductors 4 and 6 showed aPTT within, however,  
133 FIX concentrations slightly below the reference range. The clinical signs together with the  
134 blood coagulation parameters and X-chromosomal transmission supported the diagnosis of  
135 a hemophilia B. The definite clinical diagnosis prompted us to search for the molecular cause  
136 initially on DNA level. The canine *F9* gene is located on chromosome X (CFAX) between  
137 positions 109,501,341 (transcription start site) and 109,533,798 and has a length of 32,458  
138 bp (NC\_006621.3, CanFam3.1). Similar to other mammals, the canine *F9* gene harbours 8  
139 exons with an open reading frame of 1,356 bp coding for 452 amino acids [25]. DNA of  
140 female conductors 4 and 6 were subjected to whole genome sequencing and aligned to the  
141 canine reference *F9* gene sequence. Surprisingly, only 6 sequence variants outside the  
142 coding regions of *F9* were identified (Table 2). Five variants were located in introns and were  
143 excluded as cause for hemophilia B in the Hovawarts. The remaining variant (deletion) was  
144 located in the promoter of *F9* 73 bp upstream of the start codon. As this deletion was  
145 located within a putative transcription factor binding site of hepatocyte nuclear factor 4 $\alpha$   
146 (HNF4 $\alpha$ ) and androgen receptor (AR) which had been shown in humans to be important for  
147 *F9* expression and mutated in hemophilia B Leyden and Brandenburg [23, 24], this position  
148 was analysed in more detail.

149 Figure 2 shows the segregation of the nucleotide deletion in the affected Hovawart family.  
150 The female conductors 4 and 6 were heterozygous, evident by the overlapping peaks with  
151 similar heights 5' of the deletion position. The affected male 3 was hemizygous for the  
152 deleted allele whereas his sister 5 and cousin 7 were homozygous wild type. Genotyping of  
153 1,298 dogs (including 83 different breeds, 720 unrelated Hovawarts, 12 Hovawart family  
154 members) demonstrated the occurrence of the deletion only among members of the  
155 affected Hovawart family (Table 3). To provide proof that the deletion represented the  
156 causative genetic variant and resulted in the low expression of *F9*, electrophoretic mobility  
157 shift and luciferase reporter assays were performed.

158 As shown in Fig 3 no binding of recombinant HNF4 $\alpha$  to the mutated promoter region was  
159 detected. On the other hand, the AR lysate clearly showed binding to both fragments and  
160 hence the deletion seems not to influence AR binding to the androgen-responsive element  
161 in the canine *F9* promoter. This might be due to the fact that AR DNA-binding sites display an  
162 exceptional amount of sequence variation [26]. Although the C-deletion is located in the  
163 consensus TGTNCT-motif of class I AR-binding sites several alternative motives, e.g. TGT TTC  
164 in the stomatin-like protein 3 gene or TGTATC in the prostate-specific antigen gene enhancer  
165 III region, have been reported [26-28]. Therefore, it can be assumed that the affected males

166 would have recovered from hemophilia during puberty. To analyse the effect of the  
167 promoter variant on *F9* expression, wild type and mutated promoter fragment luciferase  
168 constructs were transfected into Hep G2 cells. As shown in Fig 4 the mutated promoter  
169 fragment resulted in a statistically significant reduction of gene expression to approximately  
170 34.6 % of the wild type promoter. The remaining activity of the mutated promoter is in  
171 agreement with the clinical findings of a residual FIX activity in the affected males (Table 1)  
172 and the results of the EMSA showing binding of AR in androgen-dependent promoter  
173 activation.

174 In summary, we have identified and elucidated the causative genetic variant for hemophilia  
175 B Leyden in Hovawarts. This is the first report on a single nucleotide deletion within the  
176 binding sites of HNF4 $\alpha$  and AR in the *F9* promoter causing hemophilia B Leyden in dogs. As  
177 the deletion only abolishes the binding of HNF4 $\alpha$ , it can be assumed that male dogs will  
178 most likely recover during puberty as reported in humans [29-31]. However, to prevent any  
179 risk of a further propagation of the disorder genotyping of females is recommended in  
180 further breeding.

## 181 Materials and Methods

### 182 Ethical statement

183 The collection of dog blood and/or hair samples was done by local veterinarians. The  
184 collection of samples was approved by the Lower Saxony State Office for Consumer  
185 Protection and Food Safety (33.19-42502-05-15A506) according to §8a Abs. 1 Nr. 2 of the  
186 German Animal Protection Law (TierSchG).

187

### 188 Animals and genomic DNA isolation

189 EDTA blood and/or hair samples were provided by different Hovawart and dog breeders  
190 with written owner consent. DNA was extracted from 30-50 hair roots using the QIAamp  
191 DNA Mini Kit (Qiagen, Hilden, Germany) according to the manufacturer's instructions. A  
192 salting out procedure [32] was used for EDTA blood samples. Additional DNA samples  
193 deposited with the Institute of Veterinary Medicine were used as controls. All samples were  
194 pseudonymized using internal IDs.

195

### 196 Coagulation assays and FIX activity measurement

197 APTT was measured coagulometrically using different commercially available activating  
198 reagents according to the manufacturer's test instructions. To standardize measurement  
199 results performed in different laboratories, ratio values (aPTT patient/median aPTT of  
200 healthy dogs) were calculated and reported. FIX activity was measured coagulometrically  
201 using human FIX deficient plasma and a commercial human aPTT reagent for activation.  
202 Canine pooled plasmas were used as reference (activity defined as 100 %).

203

### 204 Next generation sequencing (NGS) and genotyping

205 DNA of 4 and 6 was used for NGS on an Illumina HiSeq2500. A 450 bp library was prepared  
206 from genomic DNA with the NEBNext Ultra DNA Library Prep Kit for Illumina (New England  
207 Biolabs GmbH, Frankfurt, Germany) following the manufacturer's instructions. Library  
208 quality was evaluated with Agilent2100 Bioanalyzer. Quality of fastq-files was analysed using  
209 FastQC 0.11.7 [33]. Total reads of 1,029,601,630 (4) and 1,000,503,256 (6) were obtained  
210 and mapped to the reference canine *F9* gene (NC\_006621.3, region 109,501,341 to  
211 109,533,798; CanFam3.1) using DNASTAR Lasergene Genomics Suite SeqMan NGen 15.2.0  
212 (130) [34-36]. The following assembly options were used: mer-size 31 nt, min. match  
213 percentage 98, high layout stringency, min. aligned length 120 nt, min. layout length 50 nt,  
214 max. gap size 5 nt. Duplicate reads were combined and clonal reads removed. For 4 4,590  
215 and for 6 4,982 consistent paired reads were assembled. The sample wise insert size metrics  
216 for high quality aligned reads was median pair distance 383.1 bp (SD 117.46 bp, min.  
217 distance 151 bp, max. distance 894 bp) for 4 and 383.9 bp (SD 103.55 bp, min. distance 153  
218 bp, max. distance 882 bp) for 6.

219 Targeted genotyping of the promoter deletion was done by PCR amplification with primers  
220 *cfa\_F9\_Ex1\_F* (5'-CCACTGAGGGAGATGGACAC-3') and *cfa\_F9\_Ex1\_R* (5'-  
221 CCCACATGCTGACGACTAGA-3') resulting in a fragment of 328 bp (wild type) or 327 bp  
222 (deletion) spanning the variant position. The resulting PCR products were either directly

223 sequenced on an ABI 3730 Genetic Analyzer (Thermo Fisher Scientific, Basel, Switzerland) or  
224 genotypes were alternatively determined by RFLP analysis after cleavage with *RsaI*. In the  
225 wild type allele two fragments are generated with 52 bp and 276 bp while the allele with the  
226 deletion remained uncut.

227

### 228 **Electrophoretic mobility shift assay (EMSA)**

229 For EMSA biotin-labelled double-stranded wild type (*cfa\_F9n\_wt\_Biotin*: 5'-  
230 CAGAAGTAAATACAGCTCAACTTGTACTTTGGAACAACCTGGTCAACC-3') and mutated  
231 (*cfa\_F9n\_mut\_Biotin*: 5'-CCAGAAGTAAATACAGCTCAACTTGTATTTGGAACAACCTGGTCAACC-3')  
232 oligonucleotides were synthesized (Integrated DNA Technologies IDT, Leuven, Belgium)  
233 harbouring the overlapping HNF4 $\alpha$  and AR binding sites (underlined). The position of the  
234 deleted C-nucleotide is indicated in bold and italics. Recombinant human HNF4 $\alpha$  and human  
235 AR over-expression lysate were purchased from Origene Technologies Inc. (Rockville, USA).  
236 Binding reactions included 2  $\mu$ L 10 x binding buffer (100 mM Tris, 10 mM EDTA, 1 M KCl, 60%  
237 v/v Glycerol (86% solution), 0.1 mg/ml BSA, 0.5% Triton X-100, 1mM DTT; pH 7.5), 2  $\mu$ g  
238 poly(dI-dC) and 1.2  $\mu$ g human HNF4 $\alpha$  or 4  $\mu$ g poly(dI-dC) and 5  $\mu$ g human AR lysate. As  
239 negative controls 1 pmol duplex DNA oligos were incubated without protein or with 1  $\mu$ g  
240 BSA. Binding reactions were pre-incubated for 20 min on ice followed by 1 hour at room  
241 temperature after adding 1 pmol biotin-end labelled double-stranded oligonucleotide  
242 probes. The mixtures were loaded onto 12% Tris-Glycine gels (Invitrogen, USA). After  
243 electrophoresis at 80 V for 90 min (HNF4 $\alpha$ ) or 2 hours (AR), gels were blotted onto PVDF  
244 membranes (GE Healthcare Life Sciences, Germany) using a wet blotter for 30 min at 100 V.  
245 Membranes were crosslinked at 120 mJ/cm<sup>2</sup> using a commercial UV-light crosslinking  
246 instrument equipped with 254 nm bulbs for 1 minute. DNA detection was done employing  
247 the Chemiluminescent Nucleic Acid Detection Module Kit (Thermo Scientific, USA) with  
248 minor modifications, *i.e.* membranes were incubated for 1 min in the substrate working  
249 solution.

250

### 251 **Luciferase-Assay**

252 For the luciferase assay the pGL3 Luciferase Reporter Vectors (pGL3-Basic, pGL3-Control)  
253 were used (Promega, Mannheim, Germany). The wild type *F9* promoter fragment (971 bp  
254 wild type) was generated by PCR using primers *cfa9\_HindIII\_F\_neu* (5'-  
255 CGTAGACTTAGCACTGTTCAAAGCTTCACACACACAGTTCTTAAAT-3') and *cfa9\_HindIII\_R\_neu*  
256 (5'-ATGGCTAGCAACCGTCTAAGAAGCTTAATTGTGCAAGGAGCAAGG-3'). The mutated *F9*  
257 promoter fragment (970 bp) was generated by PCR using primers *cfa9\_HindIII\_F* (5'-  
258 ATCGTCAAGCTTCACACACACAGTTCTTAAAT-3') and *cfa9\_HindIII\_R* (5'-  
259 CGTACGAAGCTTAATTGTGCAAGGAGCAAGG-3'). For cloning into the *HindIII* restriction site of  
260 pGL3 primers were designed with an unspecific random 5'-tag (*italics*) followed by a *HindIII*  
261 restriction site (underlined). DNA of heterozygous female 6 served as template for  
262 amplification. Promoter fragment design was geared to an equivalence of the canine  
263 genomic situation choosing a respective distance between NC\_006621.3:g.109,501,492delC  
264 and the luciferase start codon. Recombinant pGL3 vectors were used for transformation of

265 *E. coli* XL1-Blue according to the manufacturer's protocol. Plasmid DNA of 17 colonies of  
266 pGL3Basic+970bpinsertF9\_MT and 37 colonies of pGL3Basic+971bpinsertF9\_WT were  
267 isolated using Promega PureYield Plasmid Miniprep Kit (Promega, Mannheim, Germany) and  
268 sequenced for validation. A validated clone of each construct was incubated in LB-medium  
269 and plasmid DNA was isolated using Qiagen Plasmid Maxi Kit (Qiagen, Hilden, Germany).  
270 For normalization *Renilla* luciferase activity was measured by co-transfecting pHRL-TK(Int-)  
271 (Promega, Mannheim, Germany). Low expression levels of C/EBP in Hep G2 cells were  
272 complemented by co-transfection of a C/EBP $\alpha$  expression vector [22]. The carboxy-terminal  
273 triple FLAG human C/EBP $\alpha$  expression vector cloned in pcDNA3 was a kind gift of A. Leutz  
274 and E. Kowenz-Leutz (MDC, Berlin, Germany).  
275 For analysis of promoter activity human hepatoma derived cell line Hep G2 (ATCC HB-8065)  
276 was cultivated in Roti-CELL DMEM High Glucose (Carl Roth GmbH, Karlsruhe, Germany) [37].  
277 Constructs were transfected using Effectene Transfection Reagent (Qiagen, Hilden,  
278 Germany). Firefly and *Renilla* luciferase luminescence was measured using the Dual-Glo  
279 Luciferase Assay System (Promega, Mannheim, Germany) on a Tecan GENios Pro 96/384  
280 Multifunction Microplate Reader (Tecan GmbH, Crailsheim, Germany) with the analysis  
281 software XFlour v4.64 after cell lysis with Passive Lysis 5X Buffer (Promega, Mannheim,  
282 Germany). Experiments were repeated 5-times with two measurements each. Background  
283 luminescence values were subtracted from raw luminescence values. *Renilla* luciferase  
284 activities were used for normalization [38]. Data are presented as relative response ratios  
285 [39]. To determine statistical significance Mann-Whitney *U* test was used. Values were  
286 considered statistically significant when \**p* < 0.05 (low), \*\**p* < 0.01 (medium) and \*\*\**p* <  
287 0.001 (high).

288

## 289 Acknowledgments

290 The authors are grateful to S. Pach for expert technical assistance. L. Binder is thanked for  
291 support. The owners of Hovawarts who have provided blood samples are thanked for their  
292 generous support. A. Leutz and E. Kowenz-Leutz are thanked for providing the C/EBP $\alpha$   
293 expression vector. S. Shan and F. Xu are supported with a fellowship by the Chinese  
294 Scholarship Council (CSC).



## 295 References

- 296 1. Dolan G, Benson G, Duffy A, Hermans C, Jimenez-Yuste V, Lambert T, et al.  
297 Haemophilia B: Where are we now and what does the future hold? *Blood Rev.*  
298 2018;32(1):52-60. doi: 10.1016/j.blre.2017.08.007. PubMed PMID: 28826659.
- 299 2. Green P. The 'Royal disease'. *J Thromb Haemost.* 2010;8(10):2214-5. doi:  
300 10.1111/j.1538-7836.2010.03999.x. PubMed PMID: 20670371.
- 301 3. Rogaev EI, Grigorenko AP, Faskhutdinova G, Kittler EL, Moliaka YK. Genotype analysis  
302 identifies the cause of the "royal disease". *Science.* 2009;326(5954):817. doi:  
303 10.1126/science.1180660. PubMed PMID: 19815722.
- 304 4. Rallapalli PM, Kemball-Cook G, Tuddenham EG, Gomez K, Perkins SJ. An interactive  
305 mutation database for human coagulation factor IX provides novel insights into the  
306 phenotypes and genetics of hemophilia B. *J Thromb Haemost.* 2013;11(7):1329-40.  
307 doi: 10.1111/jth.12276. PubMed PMID: 23617593.
- 308 5. Mustard JF, Rowsell HC, Robinson GA, Hoeksema TD, Downie HG. Canine haemophilia  
309 B (Christmas disease). *Br J Haematol.* 1960;6:259-66. PubMed PMID: 13727144.
- 310 6. Mustard JF, Basser W, Hedgardt G, Secord D, Rowsell HC, Downie HG. A comparison of  
311 the effect of serum and plasma transfusions on the clotting defect in canine  
312 haemophilia B. *Br J Haematol.* 1962;8:36-42. PubMed PMID: 14477606.
- 313 7. Parks BJ, Brinkhous KM, Harris PF, Penick GD. Laboratory Detection of Female Carriers  
314 of Canine Hemophilia. *Thromb Diath Haemorrh.* 1964;12:368-76. PubMed PMID:  
315 14254695.
- 316 8. Rowsell HC, Downie HG, Mustard JF, Leeson JE, Archibald JA. A disorder resembling  
317 hemophilia B (Christmas disease) in dogs. *J Am Vet Med Assoc.* 1960;137:247-50.  
318 PubMed PMID: 14439728.
- 319 9. Evans JP, Brinkhous KM, Brayer GD, Reisner HM, High KA. Canine hemophilia B  
320 resulting from a point mutation with unusual consequences. *Proc Natl Acad Sci U S A.*  
321 1989;86(24):10095-9. PubMed PMID: 2481310; PubMed Central PMCID:  
322 PMC298651.
- 323 10. Brooks MB, Gu W, Ray K. Complete deletion of factor IX gene and inhibition of factor IX  
324 activity in a labrador retriever with hemophilia B. *J Am Vet Med Assoc.*  
325 1997;211(11):1418-21. PubMed PMID: 9394892.
- 326 11. Gu W, Brooks M, Catalfamo J, Ray J, Ray K. Two distinct mutations cause severe  
327 hemophilia B in two unrelated canine pedigrees. *Thromb Haemost.* 1999;82(4):1270-5.  
328 PubMed PMID: 10544912.
- 329 12. Brooks MB, Gu W, Barnas JL, Ray J, Ray K. A Line 1 insertion in the Factor IX gene  
330 segregates with mild hemophilia B in dogs. *Mamm Genome.* 2003;14(11):788-95. doi:  
331 10.1007/s00335-003-2290-z. PubMed PMID: 14722728.
- 332 13. Feldman DG, Brooks MB, Dodds WJ. Hemophilia B (factor IX deficiency) in a family of  
333 German shepherd dogs. *J Am Vet Med Assoc.* 1995;206(12):1901-5. PubMed PMID:  
334 7790304.
- 335 14. Kooistra HS, Slappendel RJ. [A young male mongrel with hemophilia-B (Christmas  
336 disease)]. *Tijdschr Diergeneeskd.* 1991;116(6):281-5. PubMed PMID: 2028457.

- 337 15. Mauser AE, Whitlark J, Whitney KM, Lothrop CD, Jr. A deletion mutation causes  
338 hemophilia B in Lhasa Apso dogs. *Blood*. 1996;88(9):3451-5. PubMed PMID: 8896410.
- 339 16. Mischke R, Kuhnlein P, Kehl A, Langbein-Detsch I, Steudle F, Schmid A, et al. G244E in  
340 the canine factor IX gene leads to severe haemophilia B in Rhodesian Ridgebacks. *Vet J*.  
341 2011;187(1):113-8. doi: 10.1016/j.tvjl.2010.01.017. PubMed PMID: 20303304.
- 342 17. Nakata M, Sakai M, Sakai T. Hemophilia B in a crossbred Maltese dog. *J Vet Med Sci*.  
343 2006;68(11):1223-4. PubMed PMID: 17146185.
- 344 18. Reitsma PH, Mandalaki T, Kasper CK, Bertina RM, Briet E. Two novel point mutations  
345 correlate with an altered developmental expression of blood coagulation factor IX  
346 (hemophilia B Leyden phenotype). *Blood*. 1989;73(3):743-6. PubMed PMID: 2917196.
- 347 19. Reitsma PH, Bertina RM, Ploos van Amstel JK, Riemens A, Briet E. The putative factor IX  
348 gene promoter in hemophilia B Leyden. *Blood*. 1988;72(3):1074-6. PubMed PMID:  
349 3416069.
- 350 20. Veltkamp JJ, Meilof J, Remmelts HG, van der Vlerk D, Loeliger EA. Another genetic  
351 variant of haemophilia B: haemophilia B Leyden. *Scand J Haematol*. 1970;7(2):82-90.  
352 PubMed PMID: 5450691.
- 353 21. Funnell AP, Crossley M. Hemophilia B Leyden and once mysterious cis-regulatory  
354 mutations. *Trends Genet*. 2014;30(1):18-23. doi: 10.1016/j.tig.2013.09.007. PubMed  
355 PMID: 24138812.
- 356 22. Picketts DJ, Lillicrap DP, Mueller CR. Synergy between transcription factors DBP and  
357 C/EBP compensates for a haemophilia B Leyden factor IX mutation. *Nat Genet*.  
358 1993;3(2):175-9. doi: 10.1038/ng0293-175. PubMed PMID: 8499951.
- 359 23. Heit JA, Ketterling RP, Zapata RE, Ordonez SM, Kasper CK, Sommer SS. Haemophilia B  
360 Brandenburg-type promoter mutation. *Haemophilia*. 1999;5(1):73-5. PubMed PMID:  
361 10215951.
- 362 24. Crossley M, Ludwig M, Stowell KM, De Vos P, Olek K, Brownlee GG. Recovery from  
363 hemophilia B Leyden: an androgen-responsive element in the factor IX promoter.  
364 *Science*. 1992;257(5068):377-9. PubMed PMID: 1631558.
- 365 25. Evans JP, Watzke HH, Ware JL, Stafford DW, High KA. Molecular cloning of a cDNA  
366 encoding canine factor IX. *Blood*. 1989;74(1):207-12. PubMed PMID: 2752110.
- 367 26. Reid KJ, Hendy SC, Saito J, Sorensen P, Nelson CC. Two classes of androgen receptor  
368 elements mediate cooperativity through allosteric interactions. *J Biol Chem*.  
369 2001;276(4):2943-52. Epub 2000/11/01. doi: 10.1074/jbc.M009170200. PubMed  
370 PMID: 11056175.
- 371 27. Wilson S, Qi J, Filipp FV. Refinement of the androgen response element based on ChIP-  
372 Seq in androgen-insensitive and androgen-responsive prostate cancer cell lines. *Sci*  
373 *Rep*. 2016;6:32611. Epub 2016/09/15. doi: 10.1038/srep32611. PubMed PMID:  
374 27623747; PubMed Central PMCID: PMC5021938.
- 375 28. Schuur ER, Henderson GA, Kmetec LA, Miller JD, Lamparski HG, Henderson DR.  
376 Prostate-specific antigen expression is regulated by an upstream enhancer. *J Biol*  
377 *Chem*. 1996;271(12):7043-51. Epub 1996/03/22. PubMed PMID: 8636136.

- 378 29. Reijnen MJ, Sladek FM, Bertina RM, Reitsma PH. Disruption of a binding site for  
379 hepatocyte nuclear factor 4 results in hemophilia B Leyden. *Proc Natl Acad Sci U S A*.  
380 1992;89(14):6300-3. PubMed PMID: 1631121; PubMed Central PMCID:  
381 PMCPMC49488.
- 382 30. Reijnen MJ, Peerlinck K, Maasdam D, Bertina RM, Reitsma PH. Hemophilia B Leyden:  
383 substitution of thymine for guanine at position -21 results in a disruption of a  
384 hepatocyte nuclear factor 4 binding site in the factor IX promoter. *Blood*.  
385 1993;82(1):151-8. PubMed PMID: 8324220.
- 386 31. Morgan GE, Rowley G, Green PM, Chisholm M, Giannelli F, Brownlee GG. Further  
387 evidence for the importance of an androgen response element in the factor IX  
388 promoter. *Br J Haematol*. 1997;98(1):79-85. PubMed PMID: 9233568.
- 389 32. Miller SA, Dykes DD, Polesky HF. A simple salting out procedure for extracting DNA  
390 from human nucleated cells. *Nucleic Acids Res*. 1988;16(3):1215. PubMed PMID:  
391 3344216; PubMed Central PMCID: PMC334765.
- 392 33. Brown J, Pirrung M, McCue LA. FQC Dashboard: integrates FastQC results into a web-  
393 based, interactive, and extensible FASTQ quality control tool. *Bioinformatics*. 2017.  
394 doi: 10.1093/bioinformatics/btx373. PubMed PMID: 28605449; PubMed Central  
395 PMCID: PMCPMC5870778.
- 396 34. Lindblad-Toh K, Wade CM, Mikkelsen TS, Karlsson EK, Jaffe DB, Kamal M, et al.  
397 Genome sequence, comparative analysis and haplotype structure of the domestic dog.  
398 *Nature*. 2005;438(7069):803-19. doi: 10.1038/nature04338. PubMed PMID: 16341006.
- 399 35. Burland TG. DNASTAR's Lasergene sequence analysis software. *Methods Mol Biol*.  
400 2000;132:71-91. PubMed PMID: 10547832.
- 401 36. Clewley JP. Macintosh sequence analysis software. DNASTAR's LaserGene. *Mol*  
402 *Biotechnol*. 1995;3(3):221-4. doi: 10.1007/BF02789332. PubMed PMID: 7552691.
- 403 37. Knowles BB, Howe CC, Aden DP. Human hepatocellular carcinoma cell lines secrete the  
404 major plasma proteins and hepatitis B surface antigen. *Science*. 1980;209(4455):497-9.  
405 PubMed PMID: 6248960.
- 406 38. Jiwaji M, Daly R, Pansare K, McLean P, Yang J, Kolch W, et al. The Renilla luciferase  
407 gene as a reference gene for normalization of gene expression in transiently  
408 transfected cells. *BMC Mol Biol*. 2010;11:103. doi: 10.1186/1471-2199-11-103.  
409 PubMed PMID: 21194418; PubMed Central PMCID: PMCPMC3022783.
- 410 39. Eggers C, Hook B, Lewis S, Strayer C, Landreman A. Designing a Bioluminescent  
411 Reporter Assay: Normalization 2016 [14.11.2018]. Available from:  
412 [http://www.promega.de/resources/pubhub/designing-a-bioluminescent-reporter-](http://www.promega.de/resources/pubhub/designing-a-bioluminescent-reporter-assay-normalization/)  
413 [assay-normalization/](http://www.promega.de/resources/pubhub/designing-a-bioluminescent-reporter-assay-normalization/).
- 414 40. Bennett RL, French KS, Resta RG, Doyle DL. Standardized human pedigree  
415 nomenclature: update and assessment of the recommendations of the National  
416 Society of Genetic Counselors. *J Genet Couns*. 2008;17(5):424-33. doi:  
417 10.1007/s10897-008-9169-9. PubMed PMID: 18792771.
- 418 41. Funnell AP, Wilson MD, Ballester B, Mak KS, Burdach J, Magan N, et al. A CpG  
419 mutational hotspot in a ONECUT binding site accounts for the prevalent variant of

420 hemophilia B Leyden. Am J Hum Genet. 2013;92(3):460-7. doi:  
421 10.1016/j.ajhg.2013.02.003. PubMed PMID: 23472758; PubMed Central PMCID:  
422 PMC3591849.  
423

424 **Tables and Figures**

425 **Table 1.** Determination of hemophilia relevant blood parameters and medical reports

| ID <sup>a)</sup> | Sex | aPTT (s) <sup>b)</sup> | FIX (%) <sup>c)</sup> | Medical report                                                                                              |
|------------------|-----|------------------------|-----------------------|-------------------------------------------------------------------------------------------------------------|
| 3                | m   | n.d. <sup>d)</sup>     | 2                     | severe bleeding after chipping, blood transfusion, death caused by blood loss                               |
| 4                | f   | 12.7                   | 92                    |                                                                                                             |
| 5                | f   | 13                     | 64                    |                                                                                                             |
| 6                | f   | 13                     | 58                    |                                                                                                             |
| 7                | m   | 12.1                   | 83                    |                                                                                                             |
| 48 <sup>e)</sup> | m   | 49.6                   | 3                     | slight bleeding during second dentition, lameness/joint problems (age 4 months), several blood transfusions |
| 50               | m   | 14.4                   | n.d. <sup>d)</sup>    |                                                                                                             |
| 51 <sup>e)</sup> | m   | 56.2                   | 70                    | umbilical hernia with internal bleeding after surgery, blood transfusion, minor bleeding episodes           |
| 52               | m   | 29.7                   | 110                   |                                                                                                             |
| 53 <sup>e)</sup> | m   | 47.8                   | n.d. <sup>d)</sup>    | recurrent slight bleeding, prolonged bleeding during second dentition, lameness/joint problems              |
| 54               | m   | 12.9                   | 55                    |                                                                                                             |
| 60 <sup>e)</sup> | m   | 72.9                   | 5                     | severe bleeding after first vaccination (age 8 weeks)                                                       |
| Control 1        | m   | 11.8                   | 83                    | healthy unrelated Hovawart control                                                                          |
| Control 2        | f   | 11.6                   | >100                  | healthy unrelated Hovawart control                                                                          |

426 a) Animal IDs refer to Fig 1; b) aPTT (s): reference range 10-13.1; c) FIX (%): FIX % of standard  
 427 (reference range: 75-140%); d): n.d.: not determined; e) 48, 51, 53 and 60 had been  
 428 euthanized.

429 **Table 2.** DNA sequence variants in the canine *F9* gene determined by next generation  
430 sequencing of 4 and 6

| Position    | Ref/Alt <sup>a)</sup> | Gene region           | HGVS <sup>b)</sup> g.                |
|-------------|-----------------------|-----------------------|--------------------------------------|
| X:109501492 | C/-                   | 5'-flanking<br>region | NC_006621.3:g.109501492delC          |
| X:109504229 | C/-                   | intron 1              | NC_006621.3:g.109504229delC          |
| X:109505462 | -/AG                  | intron 1              | NC_006621.3:109505462_109505463insAG |
| X:109507446 | -/A                   | intron 2              | NC_006621.3:109507446_109507446insA  |
| X:109510986 | G/A                   | intron 3              | NC_006621.3:g.109510986G>A           |
| X:109524055 | A/G                   | intron 6              | NC_006621.3:g.109524055A>G           |

431 a) Ref/Alt: Reference nucleotide/Alternate nucleotide; b) HGVS: Human Genome Variation  
432 Society (<http://www.hgvs.org>)

433 **Table 3.** *F9* genotype frequencies

| Genotype | Hovawart                           |                     |                            | Other breeds <sup>b)</sup> |
|----------|------------------------------------|---------------------|----------------------------|----------------------------|
|          | HB <sup>a)</sup> affected<br>(n=1) | HB carrier<br>(n=2) | Control, related<br>(n=12) | Controls<br>(n= 567)       |
| C/C      |                                    |                     | 12                         | 567                        |
| C/-      |                                    | 2                   |                            |                            |
| -/-      | 1                                  |                     |                            |                            |

434 a) HB: Hemophilia B; b) Airedale Terrier (n=1), Akita Inu (n=8), Alaskan Malamute (n=1),  
435 Appenzell Cattle Dog (n=8), Australian Cattle Dog (n=8), Australian Shepherd (n=8), Barbet  
436 (n=8), Barzoi (n=8), Bavarian Mountain Scent Hound (n=3), Beagle (n=8), Bearded Collie  
437 (n=8), Belgian Shepherd Dog (n=15), Bernese Mountain Dog (n=8), Border Collie (n=11),  
438 Boston Terrier (n=8), Boxer (n=2), Briard (n=8), Cairn Terrier (n=8), Canadian Sheepdog (n=1),  
439 Catalan Sheepdog (n=1), Chinese Crested Dog (n=8), Chihuahua (n=7), Cocker Spaniel (n=1),  
440 Dachshund (n=11), Dalmatian (n=1), German Hound (n=2), Doberman (n=8), Elo (n=8),  
441 Entlebuch Cattle Dog (n=8), Eurasier (n=1), Flat Coated Retriever (n=8), Fox Terrier (n=1),  
442 French Bulldog (n=9), German Shepherd (n=12), German Shorthaired Pointer (n=2), German  
443 Spaniel (n=10), Giant Schnauzer (n=6), Giant Spitz (n=8), Golden Retriever (n=15), Great  
444 Dane (n=8), Greyhound (n=8), Irish Terrier (n=8), Jack Russel Terrier (n=10), Keeshound  
445 (n=8), Kromfohrlander (n=8), Labrador Retriever (n=10), Lagotto Romagnolo (n=8), Landseer  
446 (n=8), Leonberger (n=8), Magyar Vizsla (n=1), Maltese (n=2), Xoloitzcuintle (n=6), Miniature  
447 Spitz (n=8), Miniature Pinscher (n=8), Miniature Poodle (n=2), Mudi (n=7), Mongrel (n=34),  
448 Newfoundland (n=7), Norwich Terrier (n=8), Nova Scotia Duck Tolling Retriever (n=8),  
449 Peruvian Hairless Dog (n=6), Polish Lowland Sheepdog (n=8), Pomeranian (n=8), Poodle  
450 (n=10), Portuguese Sheepdog (n=8), Pudelpointer (n=1), Pyrenean Sheepdog smoothfaced  
451 (n=2), Rhodesian Ridgeback (n=8), Saluki (n=4), Schapendoes (n=10), Scottish Terrier (n=8),  
452 Siberian Husky (n=9), Shi Tzu (n=1), Spanish Water Dog (n=8), St. Bernard (n=8), Tibet Terrier  
453 (n=8), Welsh Terrier (n=3), West Highland White Terrier (n=7), Whippet (n=8), Yorkshire  
454 Terrier (n=10)

455 **Fig 1.** Pedigree section of the hemophilia B Leyden Hovawart family  
456 Pedigree symbols are according to the standardized human pedigree nomenclature [40].  
457 Individuals are pseudonymized using internal IDs. DNA samples were available of individuals  
458 indicated with an arrow. For males 48, 51, 53 and 60 hemophilic signs (Table 1) have been  
459 reported and the dogs had to be euthanized after recurrent hemorrhages.

460  
461 **Fig 2.** DNA sequence comparison of the mutant hepatocyte nuclear factor 4 $\alpha$   
462 (HNF4 $\alpha$ )/androgen receptor (AR) binding site in the promoter of canine *F9* in the hemophilic  
463 male (3) and relatives (4 grandmother, 5 sister, 6 mother, 7 cousin)

464 The pedigree depicts a detail of the pedigree in Fig 1. Pseudonymized animal numbers also  
465 refer to Fig 1. Pedigree symbols are according to the standardized human pedigree  
466 nomenclature [40]. DNA sequences of heterozygous 4 and 6 (female conductors) show  
467 overlapping peaks with similar heights 5' of the deletion position.

468  $X_m$ : Maternal X-chromosome;  $X_p$ : Paternal X-chromosome; HNF4 $\alpha$ : Hepatocyte nuclear  
469 factor 4 $\alpha$  binding site (consensus sequence: 5'-TGNACTTTG-3') [21, 41]; AR: 3'-part of the  
470 androgen receptor binding site (consensus sequence: 5'-AGNACANNNTGTNCT-3') [21, 41].

471  
472 **Fig 3.** Analysis of HNF4 $\alpha$  and AR binding of wild type and mutated *F9* promoter region using  
473 electrophoretic mobility shift assay

474 Human HNF4 $\alpha$  (A) and AR (B) were used to bind biotin-labelled wild type and mutated *F9*  
475 promoter fragments (*F9*-wt, *F9*-mut). Specific shifted bands (solid arrowheads) are detected  
476 in lane 2 (A) for HNF4 $\alpha$  and lanes 5 and 6 (B) for AR. To test specificity, binding reactions  
477 were also performed using BSA (lanes 3 and 4 (A), lanes 1 and 2 (B)). In lanes 5 and 6 (A) and  
478 lanes 3 and 4 (B) no protein was added. Binding reactions were separated on 12% Tris-  
479 Glycine gels. X-ray films were cropped using GIMP 2.8.22. The 70 kDa protein marker band  
480 (PageRuler Prestained Protein Ladder, Fermentas) is indicated with an asterisk (lane M). The  
481 open arrowhead indicates unbound free DNA.

482  
483 **Fig 4.** Dual-luciferase reporter analysis of *F9* promoter activities in Hep G2 cells

484 Box and whisker plot showing the change of relative response ratios (RRR) between the wild  
485 type (*F9*-wt) and mutant promoter (*F9*-mut) gene constructs. The lines in the boxes  
486 represent the median. Whiskers indicate minimum and maximum RRR values. Values have  
487 been normalized as described above. Significance levels are indicated with asterisks (\* $p$  <  
488 0.05, \*\* $p$  < 0.01, \*\*\* $p$  < 0.001).



bioRxiv preprint doi: <https://doi.org/10.1101/486773>; this version posted December 3, 2018. The copyright holder for this preprint (which was not certified by peer review) is the author/funder, who has granted bioRxiv a license to display the preprint in perpetuity. It is made available under aCC-BY 4.0 International license.

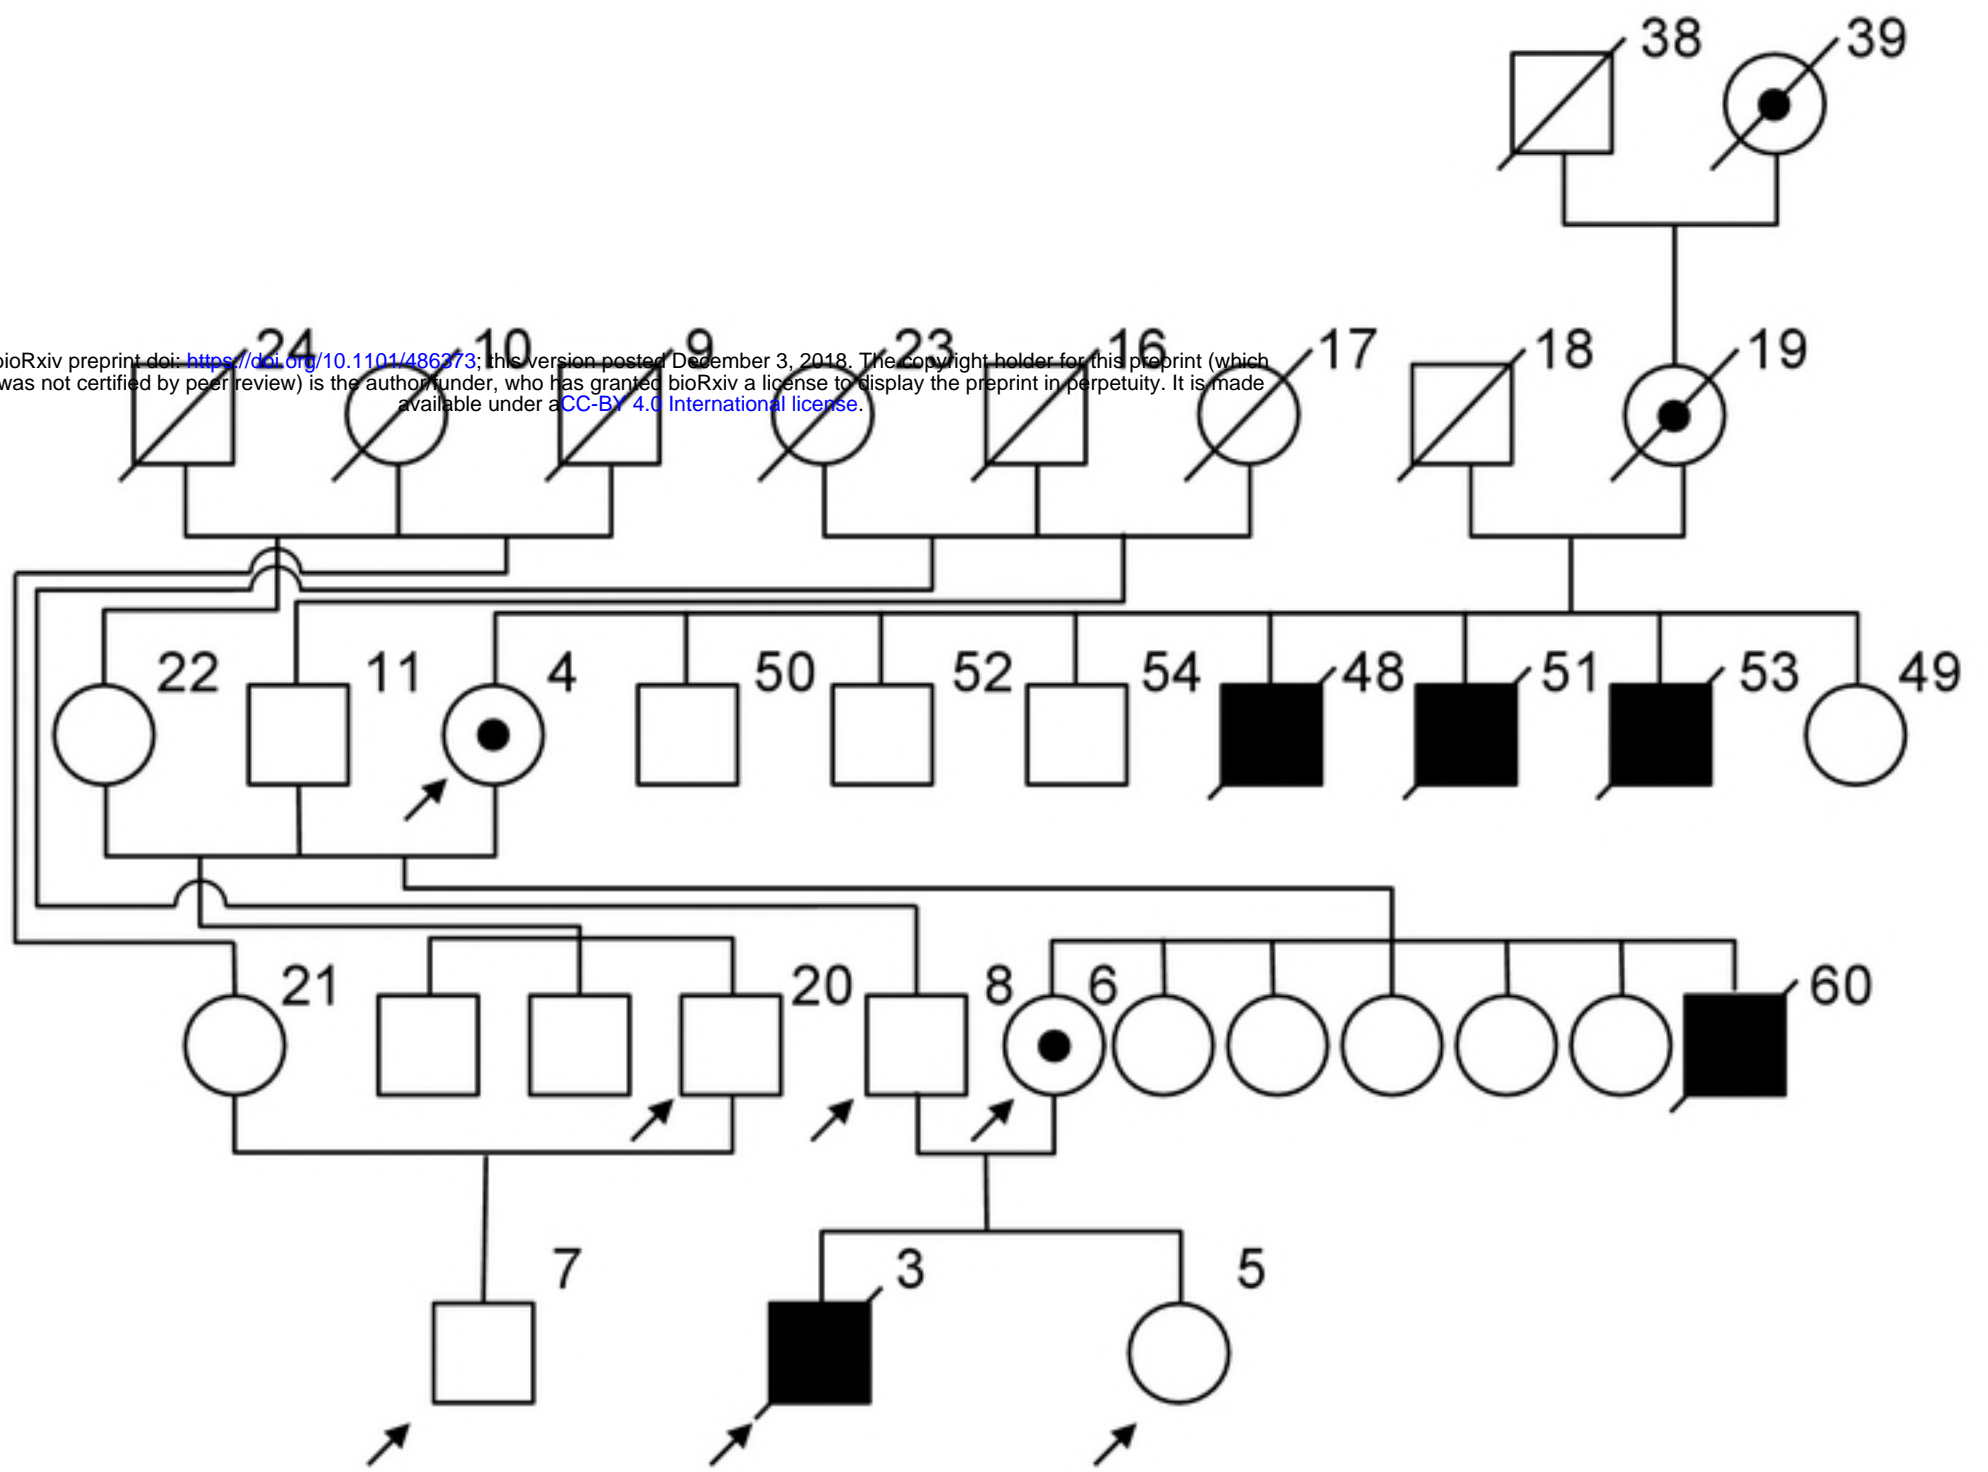

Figure 1

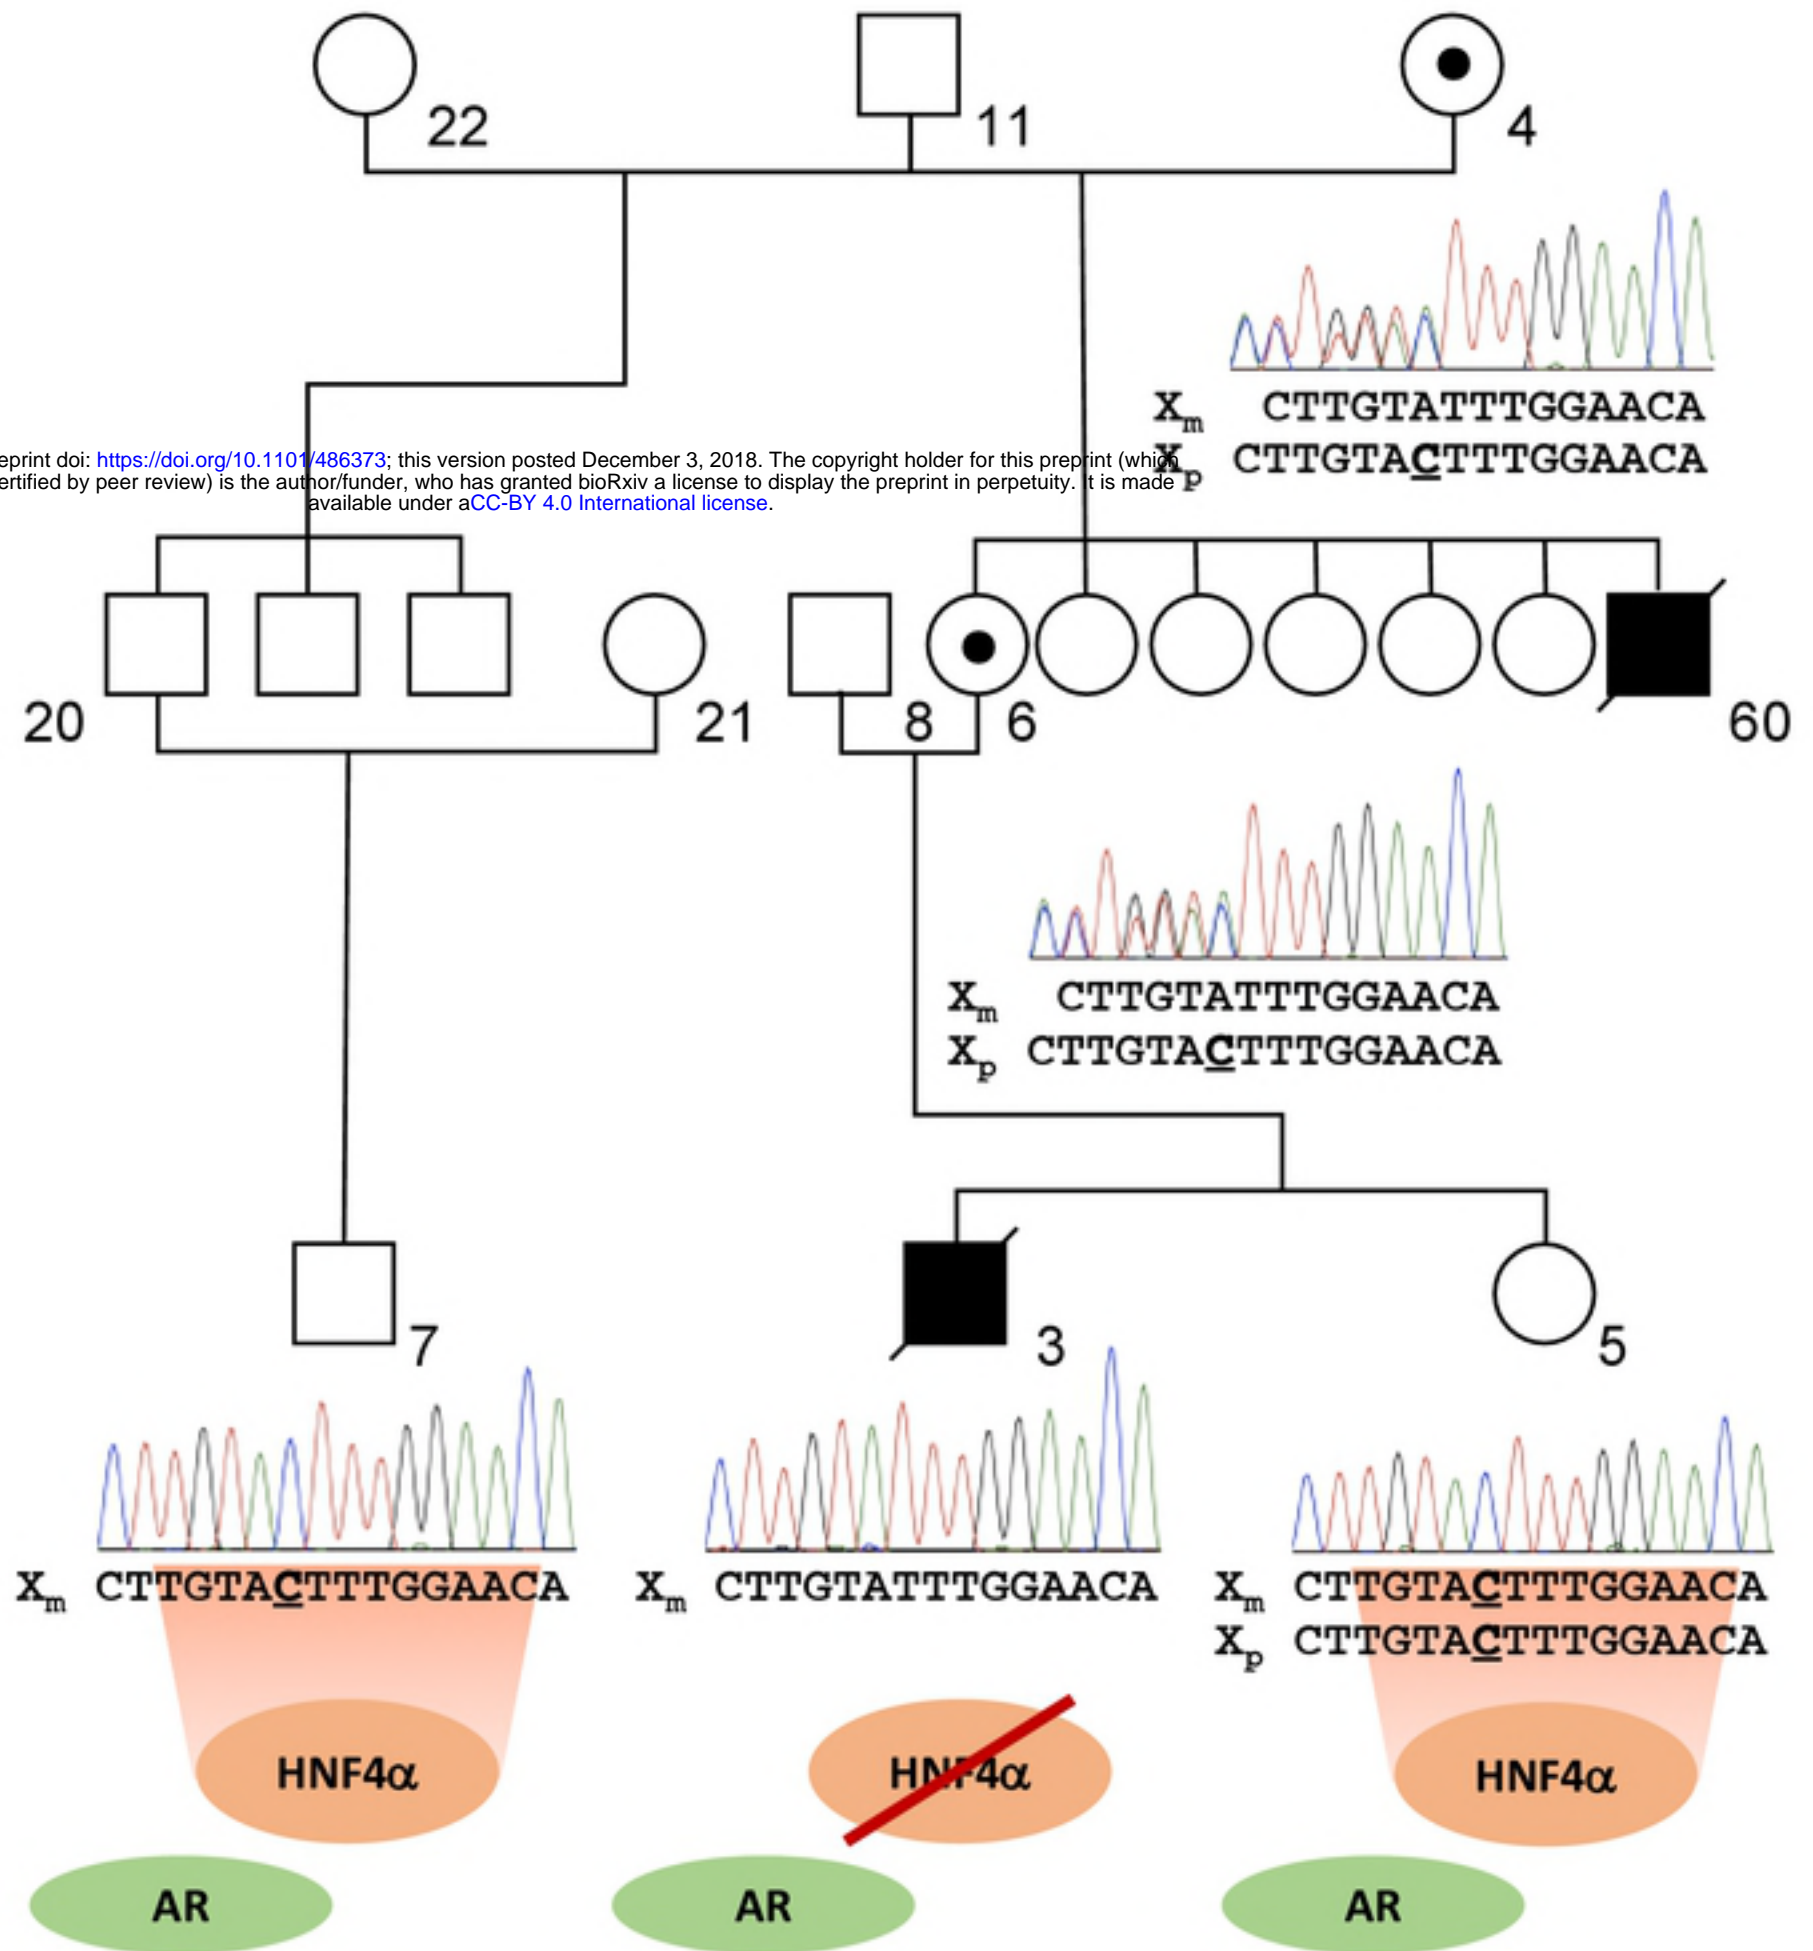

Figure 2

|                | <b>A</b> |   |   |   |   |   | <b>B</b> |   |   |   |   |   |        |
|----------------|----------|---|---|---|---|---|----------|---|---|---|---|---|--------|
|                | 1        | 2 | 3 | 4 | 5 | 6 | 1        | 2 | 3 | 4 | 5 | 6 |        |
| hHNF4 $\alpha$ | +        | + | - | - | - | - | -        | - | - | - | + | + | hAR    |
| BSA            | -        | - | + | + | - | - | +        | + | - | - | - | - | BSA    |
| F9-wt          | -        | + | - | + | - | + | -        | + | - | + | - | + | F9-wt  |
| F9-mut         | +        | - | + | - | + | - | +        | - | + | - | + | - | F9-mut |

bioRxiv preprint doi: <https://doi.org/10.1101/486373>; this version posted December 3, 2018. The copyright holder for this preprint (which was not certified by peer review) is the author/funder, who has granted bioRxiv a license to display the preprint in perpetuity. It is made available under aCC-BY 4.0 International license.

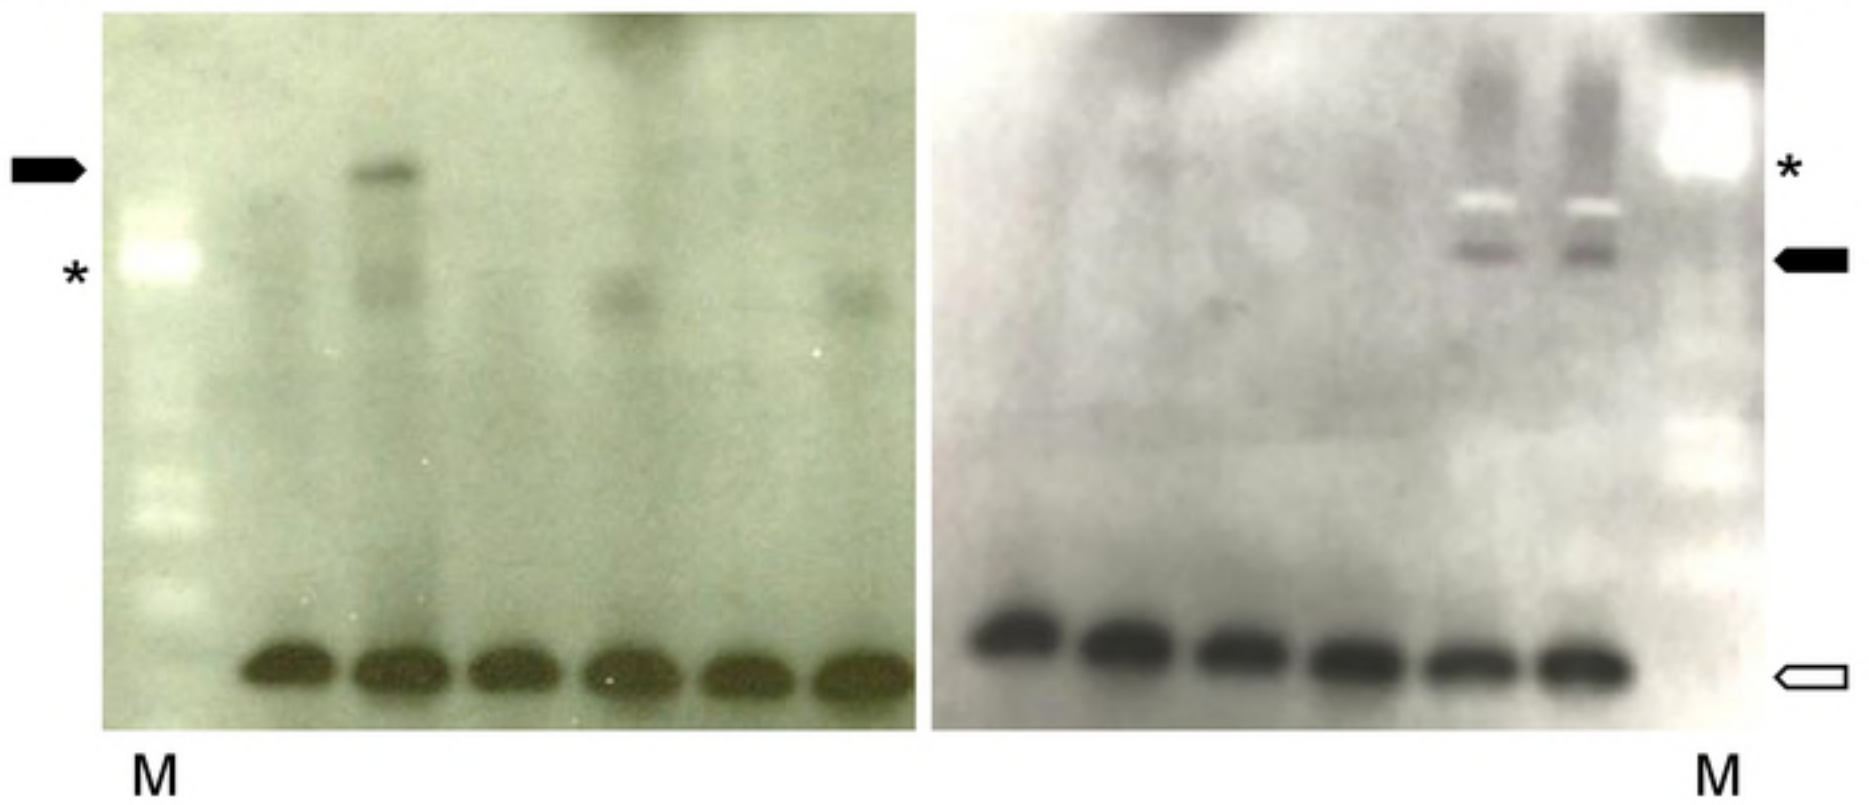

Figure 3

bioRxiv preprint doi: <https://doi.org/10.1101/486373>; this version posted December 3, 2018. The copyright holder for this preprint (which was not certified by peer review) is the author/funder, who has granted bioRxiv a license to display the preprint in perpetuity. It is made available under aCC-BY 4.0 International license.

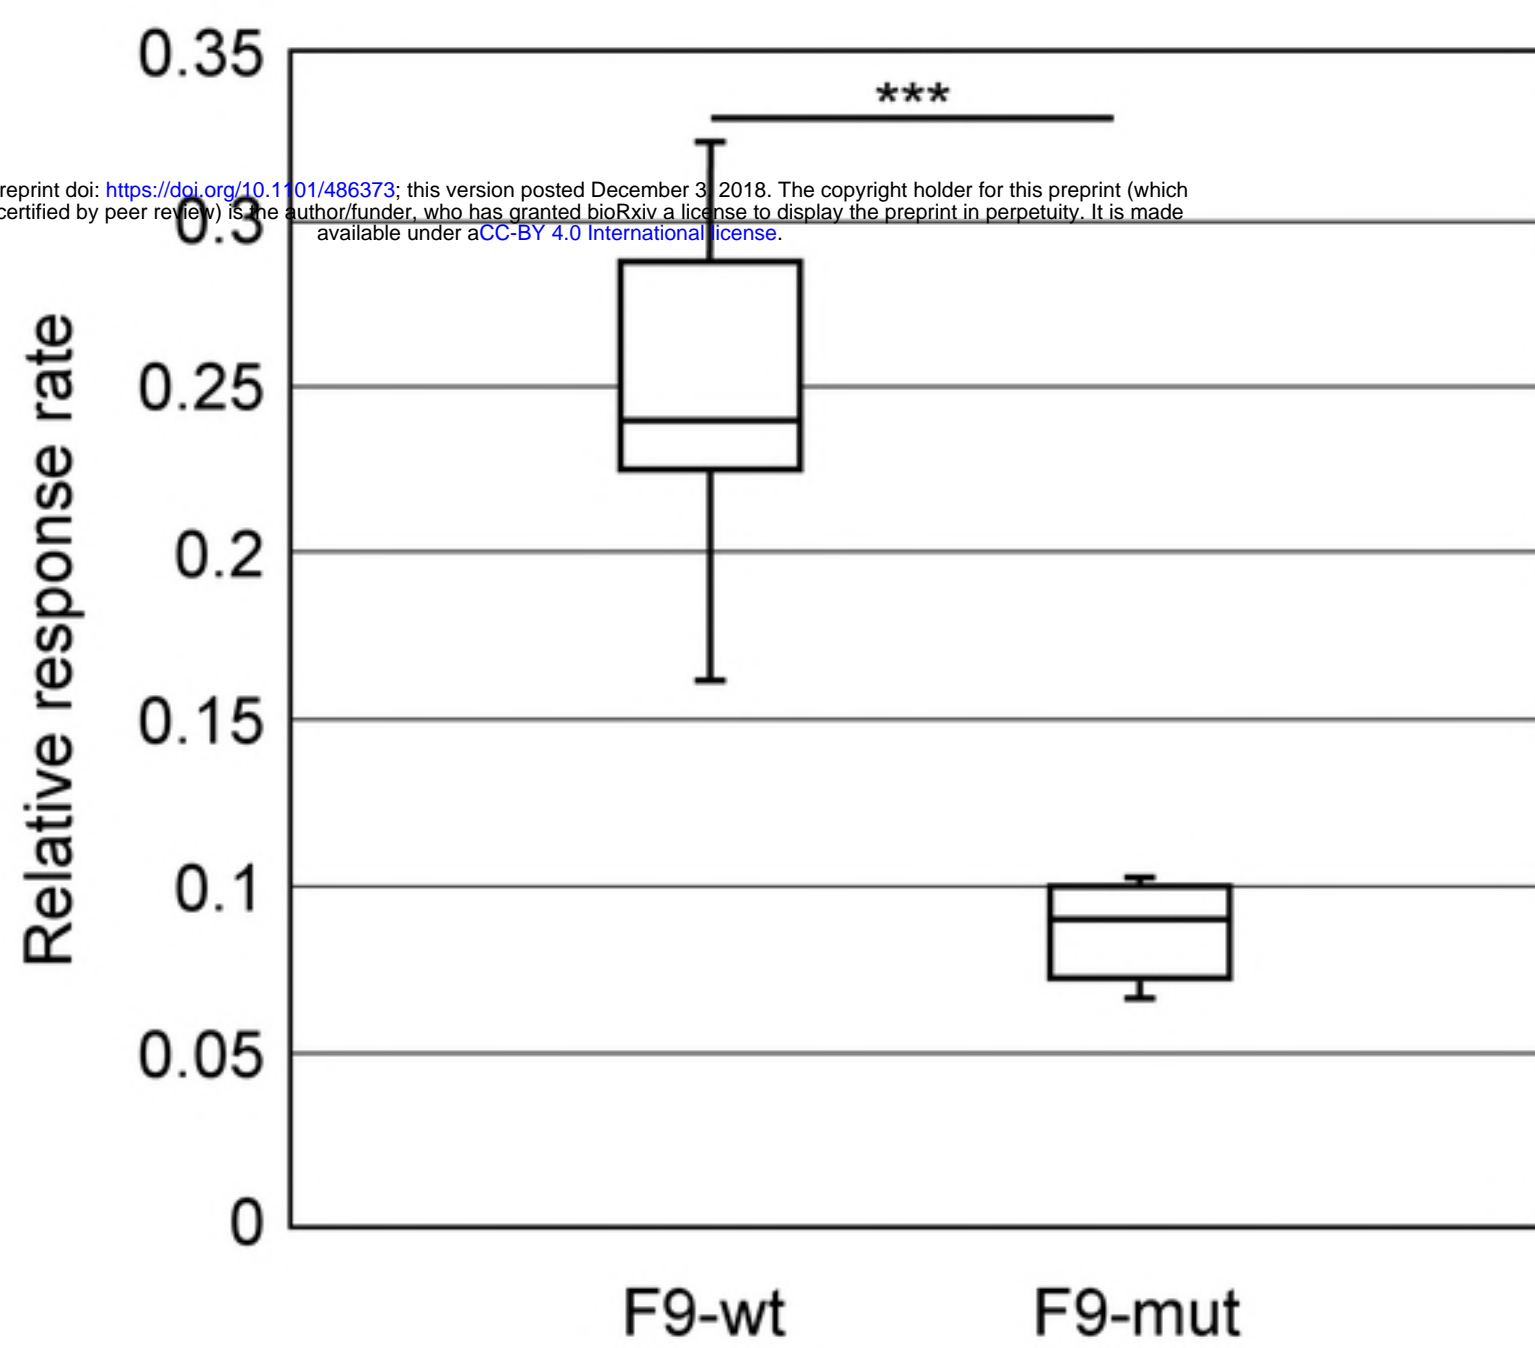

Figure 4
